# Supplementary material for: Effects of clothianidin on aquatic communities: Evaluating the impacts of lethal and sublethal exposure to neonicotinoids
Source: PubMed Central journal article supplement (PMC5363855; doi:10.1371/journal.pone.0174171), 2017-03-23
Supplement: pone.0174171.s001.pdf [file pone.0174171.s001.pdf]

1 **S1 Appendix. Supplemental methods and results for the mesocosm experiment**

2 We measured pH, temperature, and conductivity on days 11 and 18 July using a YSI  
3 Professional Plus probe. The probe was suspended in a central location in the water column  
4 during measurement. Phytoplankton was measured on days 11 and 18 in each tank by pooling  
5 300 mL of water from three different locations throughout the tank. The locations were  
6 standardized across the tanks. The samples were then filtered through Whatman GF/C filters (90  
7 mm) and stored in a freezer until chlorophyll A extraction. The GF/C filters were first cut into  
8 small pieces and placed into vials of 90% acetone. A sonicator was then used to further  
9 homogenize the mixture and 3 mL of the extract was placed in a quartz cuvette. A NanoDrop  
10 spectrophotometer was used to measure absorbance at 664 nm and 750 nm (turbidity correction).

11 The extract was then acidified using 0.1N HCl and measured at 665 (pheophyton correction).

12 The corrected chlorophyll a concentration ( $\mu\text{g L}^{-1}$ ) was determined using the following formula:

13 Chlorophyll *a* corrected ( $\mu\text{g/L}$ )=  $[26.7(664-750) - 665A] \times V1 / (V2 \times L)$

14 where:

15 665A = turbidity-corrected absorbance at 665 nm after acidification

16 V1 = volume of extractant (mL)

17 V2 = volume of sample filtered (L)

18 L = path length (cm)

19 Periphyton biomass was measured on days 11 and 18. To measure periphyton biomass,  
20 the clay tile was brought indoors and placed into a 10-L tub containing a small amount of water.  
21 The tile was scrubbed using a toothbrush to remove attached algae. The water was then filtered  
22 through a pre-weighed Whatman GF/C filter (90 mm) that had been dried for 24 hrs at 60°C.  
23 The filters were dried for 24 hrs at 60°C and weighed to determine periphyton biomass.

24 We sampled zooplankton populations on days 11 and 18. Samples were collected from  
25 five locations in the tank (each cardinal direction and the center of the tank) using a 150 mm  
26 PVC pipe capped at each end with a tennis ball. Water was then filtered through Nitex (67  
27 Micron) screening and zooplankton stored in 70% ethanol in vials for quantification. We  
28 processed the samples by inverting each vial several times and removing five 5-mL subsamples.  
29 For each subsample, the number of zooplankton was enumerated. Following enumeration, total  
30 volume of ethanol was measured for the vial. We then calculated the average abundance per mL  
31 of the five samples and extrapolated this value to the total volume of the vial.

32 Because we sampled zooplankton, phytoplankton, periphyton, and abiotics (temperature,  
33 conductivity, and pH) twice during the experiment, we conducted repeated-measures  
34 multivariate analysis of variance (rm-MANOVA). We conducted one rmMANOVA using  
35 zooplankton, phytoplankton, and periphyton and a second with the abiotic data. In the analyses,  
36 we examined the effects of time, predators, clothianidin, and their interactions. For significant  
37 univariate effects, we conducted mean comparisons using Bonferroni correction.

### 38 *Results: Mesocosm experiment*

39 We used rm-MANOVA to assess the effects of time and our treatments on zooplankton  
40 abundance, phytoplankton abundance (chl A), and periphyton biomass. We found significant  
41 multivariate effects of time, clothianidin concentration, predator\*clothianidin interaction, and  
42 time\*predator\*clothianidin interaction (S3 Table). In examining each response variable, we  
43 found no time or treatment effects for zooplankton. For periphyton, we found a significant effect  
44 of time. Averaged across the treatments, periphyton biomass was 50% lower on day 11  
45 compared to day 18. Phytoplankton abundance was the main driver of the multivariate effects.  
46 We found significant effects of time, clothianidin, predator\*clothianidin interaction, and

47 time\*predator\*clothianidin interaction (S3 Table, S1 Figure). To examine the source of this  
48 interaction, we conducted analyses within each sample period. On day 11, there was no effect of  
49 predators ( $F_{1,29} = 2.9$ ,  $P = 0.099$ ), clothianidin concentration ( $F_{2,29} = 3.2$ ,  $P = 0.054$ ), or  
50 predator\*clothianidin interaction ( $F_{2,29} = 0.6$ ,  $P = 0.561$ ). On day 18, there was a significant  
51 effect of predators ( $F_{1,29} = 14.0$ ,  $P < 0.001$ ), clothianidin concentration ( $F_{2,29} = 13.8$ ,  $P < 0.001$ ),  
52 and predator\*clothianidin interaction ( $F_{2,29} = 15.7$ ,  $P < 0.001$ ). The interaction was driven by the  
53 352 ppb treatment within the predator treatment. Phytoplankton abundance was 3 to 28X greater  
54 in this treatment compared to all the other treatments ( $P < 0.001$ ). However, there were no  
55 differences among the remaining treatments ( $P \geq 0.118$ ).

56 We used rm-MANOVA to assess the effects of time and our treatments on temperature,  
57 conductivity, and pH. We found significant multivariate effects of time, predators,  
58 time\*clothianidin interaction, and predator\*clothianidin interaction (S4 Table). In examining  
59 each response variable, we found a significant effect of time for temperature. Averaged across  
60 the treatments, temperature was 5% lower on day 11 compared to day 18. For conductivity, we  
61 found a significant effect of time and the predator\*clothianidin interaction. Averaged across the  
62 treatments, conductivity was <1% higher on day 11 compared to day 18. The  
63 predator\*clothianidin interaction was largely driven by a single treatment. Conductivity in no-  
64 predator, 0.6 ppb treatment was 4 to 5% higher compared to the other two no-predator treatments  
65 and the predator, 0.6 ppb treatment ( $P \leq 0.039$ ). There were no other differences among  
66 treatments ( $P \geq 0.134$ ). The main driver of the multivariate effects was pH. We found  
67 significant effects of time, predators, time\*clothianidin interaction, predator\*clothianidin  
68 interaction, and the time\*predator\*clothianidin interaction (S2 Figure, S4 Table). To examine the  
69 source of the interactions, we conducted analyses within each sample period. On both dates,

70 there was a significant effect of predators ( $F_{1,29} \geq 5.4$ ,  $P \leq 0.027$ ), clothianidin concentration ( $F_{2,29}$   
71  $\geq 6.9$ ,  $P \leq 0.004$ ), and predator\*clothianidin interaction ( $F_{2,29} \geq 4.9$ ,  $P \leq 0.014$ ). On day 11 within  
72 each predator treatment, pH tended to be higher in the 352 ppb treatment compared to the other  
73 two clothianidin concentrations. On day 18 within each predator treatment, pH tended to be  
74 higher in the 0.6 and/or 5 ppb treatment compared to the 352 ppb treatment. Given that the  
75 maximum different between any of the treatments within the sample dates was less than 2%, we  
76 will not address these treatment differences in detail.

### 77 *Concentration determination*

78 An Agilent 1200 Rapid Resolution LC system coupled to an Agilent 6460 series QQQ  
79 MS was used to analyze pesticides in our stock solution, experimental and environmental  
80 samples. Insecticide concentrations were determined using a modified QuEChERS protocol [1].  
81 An Agilent Zorbax SB-Phenyl 4.6 mm x 150 mm, 5  $\mu$ m column was used for LC separation  
82 (Agilent Technologies, Santa Clara, CA). The buffers were (A) water + 5 mM ammonium  
83 acetate + 0.1 % formic acid and (B) acetonitrile (90%) + 5 mM ammonium acetate (10%) + 0.1%  
84 formic acid. The linear LC gradient was as follows: time 0 min, 20% B; time 0.5 min, 20% B;  
85 time 10 min, 100% B; time 11 min, 100% B; time 11.5 min, 20% B; time 15 min, 20% B. The  
86 flow rate was 0.8 mL/min. Multiple reaction monitoring was used for MS analysis. The data  
87 were acquired in positive or negative electrospray ionization (ESI) mode. The jet stream ESI  
88 interface had a gas temperature of 330°C, gas flow rate of 10 L/min, nebulizer pressure of 35 psi,  
89 sheath gas temperature of 250°C, sheath gas flow rate of 7 L/min, capillary voltage of 4000 V in  
90 positive mode/3500 V in negative mode, and nozzle voltage of 1000 V. The  $\Delta$ EMV voltage was  
91 300 in both positive and negative modes.

92

93

94

### Literature Cited

95

96 1. Dankyi E, Carboo D, Gordon C, Fomsgaard IS. Application of the QuEChERS procedure

97 and LC-MS/MS for the assessment of neonicotinoid insecticide residues in cocoa beans

98 and shells. J Food Compos Anal. 2015. 44:149-57.

99
