# Supplementary material for: Effects of clothianidin on aquatic communities: Evaluating the impacts of lethal and sublethal exposure to neonicotinoids
Source: PubMed Central journal article supplement (PMC5363855; doi:10.1371/journal.pone.0174171), 2017-03-23
Supplement: pone.0174171.s002.pdf [file pone.0174171.s002.pdf]

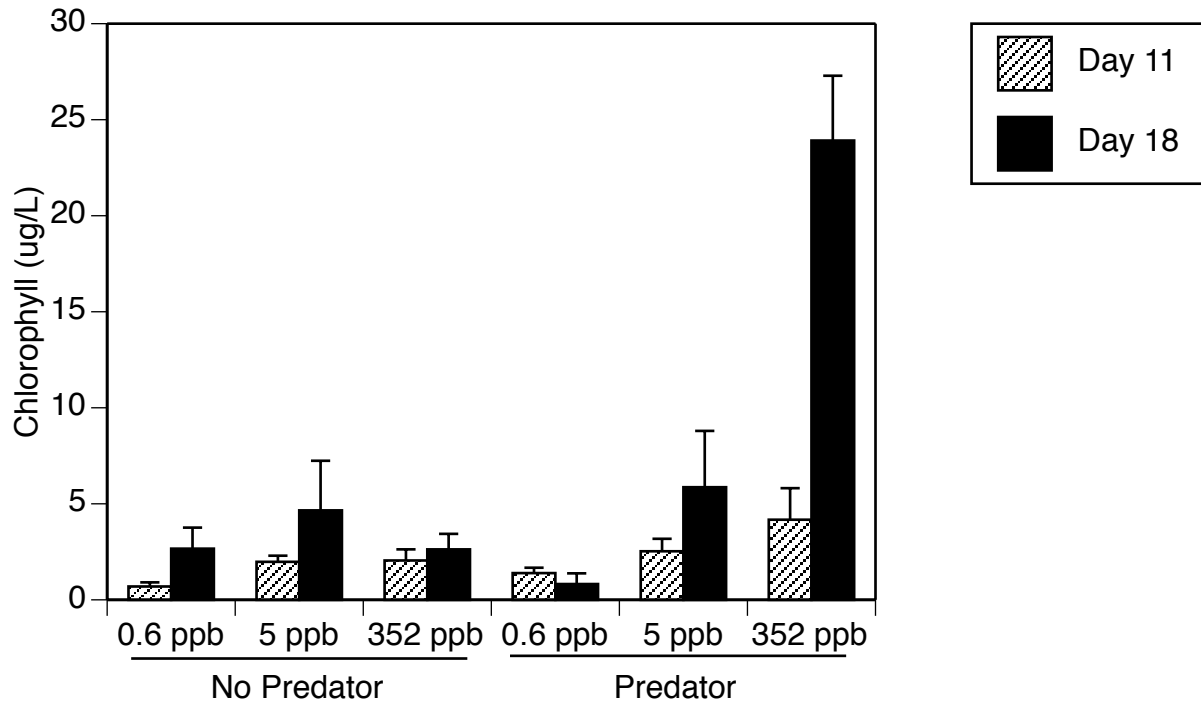

1  
 2 **S1 Figure. Phytoplankton measurements for the two sampling periods (days 11 and 18 of**  
 3 **the experiment).** Time periods are represented by patterns denoted in the figure legend. Data are  
 4 means + 1 SE.

5
