# Supplementary material for: Effects of clothianidin on aquatic communities: Evaluating the impacts of lethal and sublethal exposure to neonicotinoids
Source: PubMed Central journal article supplement (PMC5363855; doi:10.1371/journal.pone.0174171), 2017-03-23
Supplement: pone.0174171.s003.pdf [file pone.0174171.s003.pdf]

1

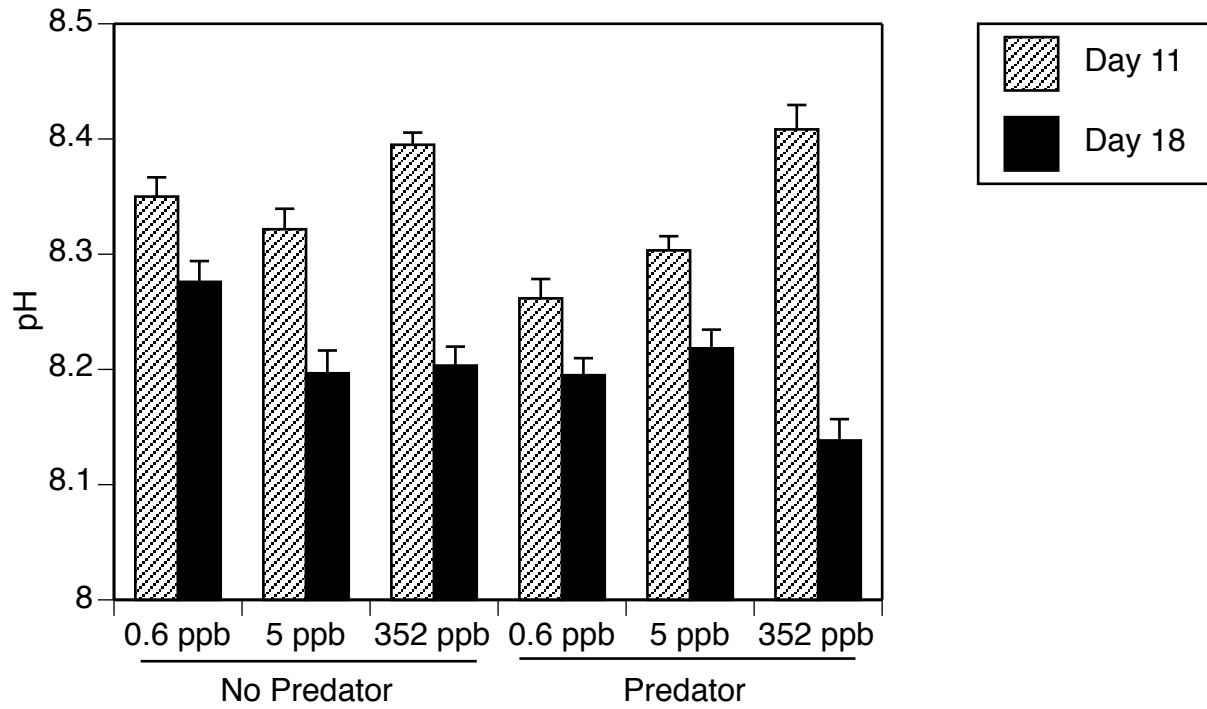

2

3 **S2 Figure. pH measurements for the two sampling periods (days 11 and 18 of the**  
4 **experiment).** Time periods are represented by patterns denoted in the figure legend. Data are  
5 means + 1 SE.
