# Supplementary material for: Effects of clothianidin on aquatic communities: Evaluating the impacts of lethal and sublethal exposure to neonicotinoids
Source: PubMed Central journal article supplement (PMC5363855; doi:10.1371/journal.pone.0174171), 2017-03-23
Supplement: pone.0174171.s005.pdf [file pone.0174171.s005.pdf]

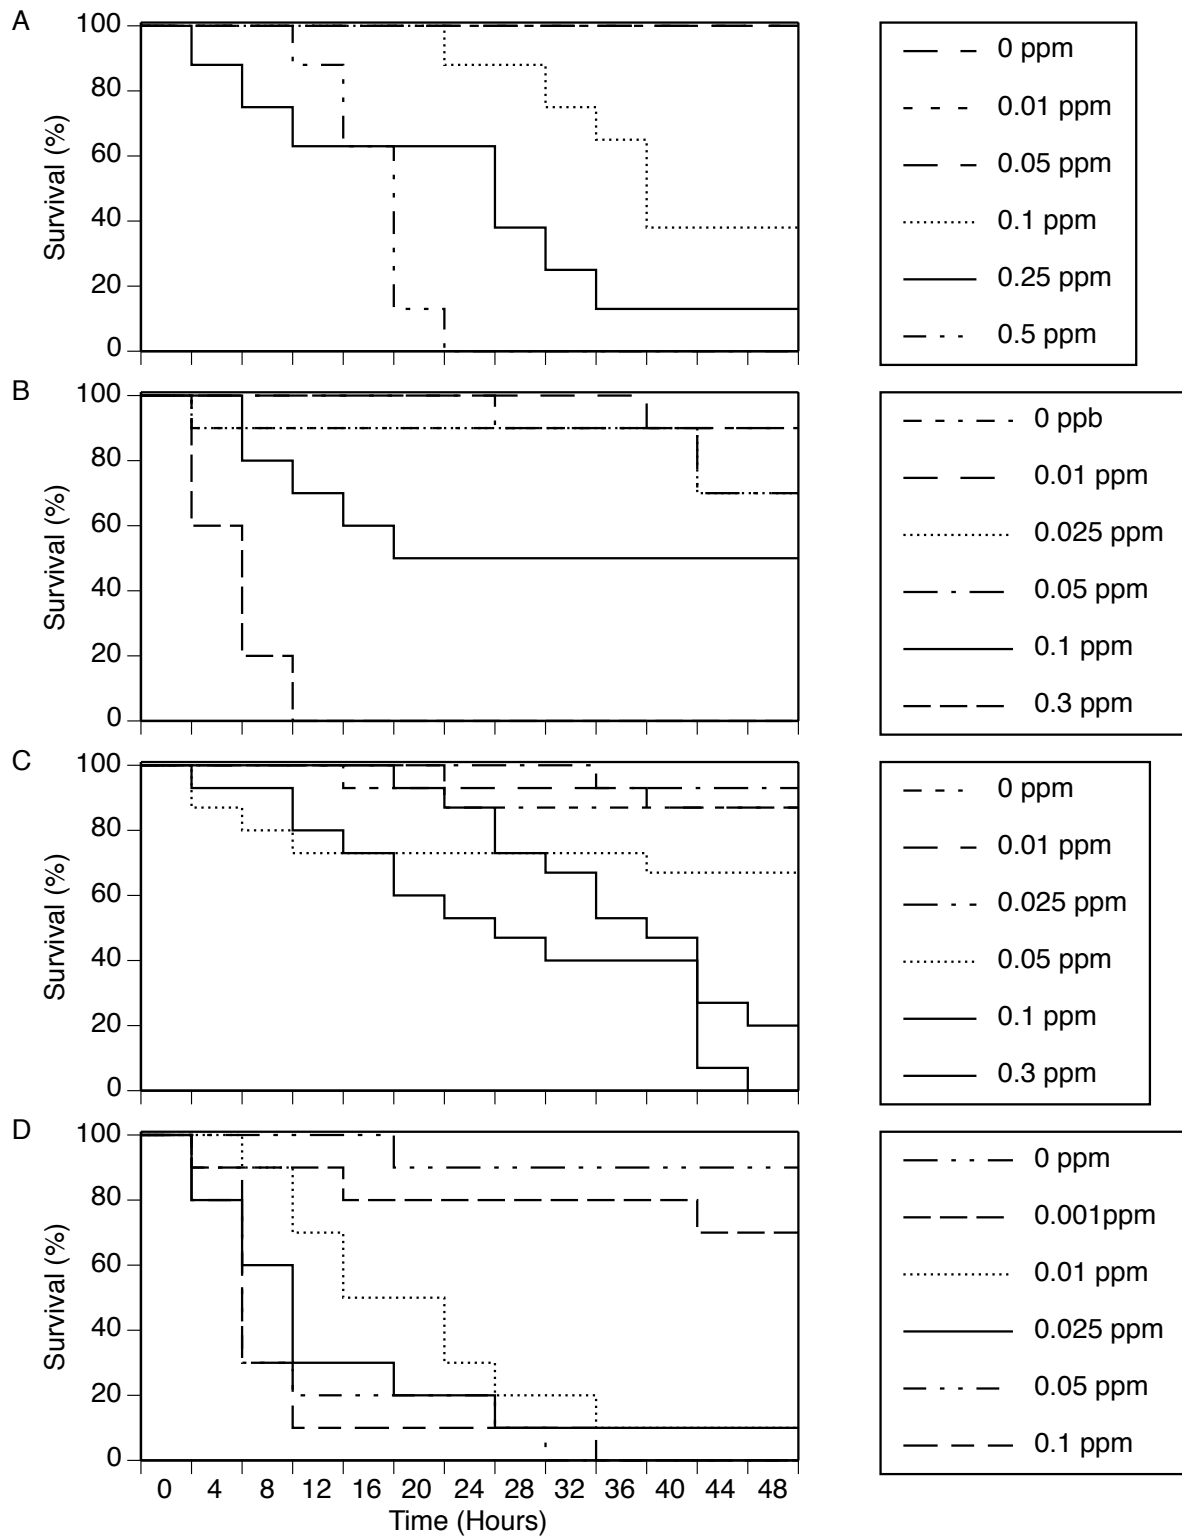

1  
 2 **S4 Figure. Survival curves for (A) *Belostoma flumineum*, (B) *Notonecta undulata*, (C)**  
 3 ***Hesperocorixa atopodonta*, and (D) *Graphoderus fascicollis* in the 48 hr LC<sub>50</sub> tests.**
