# Supplementary material for: Effects of clothianidin on aquatic communities: Evaluating the impacts of lethal and sublethal exposure to neonicotinoids
Source: PubMed Central journal article supplement (PMC5363855; doi:10.1371/journal.pone.0174171), 2017-03-23
Supplement: pone.0174171.s006.pdf [file pone.0174171.s006.pdf]

1 **S1 Table. QQQ mass spectrometry measurements of clothianidin over time in the three**  
2 **insecticide treatments from the mesocosm experiment.** Measurements are in parts per billion  
3 (ppb).

| <b>Treatment</b> | <b>Time</b> | <b>Concentration (ppb)</b> |
|------------------|-------------|----------------------------|
| Control          | Day 0       | 0.657                      |
| Control          | Day 2       | 0.847                      |
| Control          | Day 21      | 0.289                      |
| Low (10 ppb)     | Day 0       | 5.305                      |
| Low (10 ppb)     | Day 1       | 5.313                      |
| Low (10 ppb)     | Day 2       | 4.007                      |
| Low (10 ppb)     | Day 21      | 1.532                      |
| High (500 ppb)   | Day 0       | 351.938                    |
| High (500 ppb)   | Day 1       | 199.283                    |
| High (500 ppb)   | Day 2       | 199.067                    |
| High (500 ppb)   | Day 21      | 77.550                     |

4

5
