# Supplementary material for: Effects of clothianidin on aquatic communities: Evaluating the impacts of lethal and sublethal exposure to neonicotinoids
Source: PubMed Central journal article supplement (PMC5363855; doi:10.1371/journal.pone.0174171), 2017-03-23
Supplement: pone.0174171.s007.pdf [file pone.0174171.s007.pdf]

1 **S2 Table. Results of repeated-measures MANOVA on the effects of predators and clothianidin concentration on periphyton,**  
 2 **phytoplankton, and zooplankton on the two sample dates.** Bold P-values are significant at  $P < 0.05$ .

|                  |                             | Multivariate test |      |                  | Univariate tests ( <i>P</i> values) |                  |             |
|------------------|-----------------------------|-------------------|------|------------------|-------------------------------------|------------------|-------------|
|                  |                             | df                | F    | P                | Periphyton                          | Phytoplankton    | Zooplankton |
| Within subjects  | Time                        | 3,27              | 10.5 | <b>&lt;0.001</b> | <b>&lt;0.001</b>                    | <b>&lt;0.001</b> | 0.218       |
|                  | Time*Predator               | 3,27              | 1.3  | 0.300            | 0.490                               | 0.424            | 0.169       |
|                  | Time*Clothianidin           | 6,54              | 1.5  | 0.195            | 0.980                               | <b>0.036</b>     | 0.249       |
|                  | Time* Predator*Clothianidin | 6,54              | 3.3  | <b>0.007</b>     | <b>0.063</b>                        | <b>&lt;0.001</b> | 0.867       |
| Between subjects | Predator                    | 3,27              | 2.4  | 0.093            | 0.143                               | <b>0.016</b>     | 0.954       |
|                  | Clothianidin                | 6,54              | 3.6  | <b>0.004</b>     | 0.990                               | <b>&lt;0.001</b> | 0.922       |
|                  | Predator*Clothianidin       | 6,54              | 3.3  | <b>0.008</b>     | 0.181                               | <b>0.002</b>     | 0.497       |

3

4
