# Supplementary material for: Effects of clothianidin on aquatic communities: Evaluating the impacts of lethal and sublethal exposure to neonicotinoids
Source: PubMed Central journal article supplement (PMC5363855; doi:10.1371/journal.pone.0174171), 2017-03-23
Supplement: pone.0174171.s008.pdf [file pone.0174171.s008.pdf]

1 **Table S3. Results of repeated-measures MANOVA on the effects of predators and clothianidin concentration on temperature,**  
 2 **conductivity, and pH on the two sample dates. Bold P-values are significant at  $P < 0.05$ .**

|                  |                             | Multivariate test <sup>1</sup> |       |                  | Univariate tests ( <i>P</i> values) |              |                  |
|------------------|-----------------------------|--------------------------------|-------|------------------|-------------------------------------|--------------|------------------|
|                  |                             | df                             | F     | P                | Temperature                         | Conductivity | pH               |
| Within subjects  | Time                        | 3,27                           | 753.5 | <b>&lt;0.001</b> | <b>&lt;0.001</b>                    | <b>0.013</b> | <b>&lt;0.001</b> |
|                  | Time*Predator               | 3,27                           | 1.7   | 0.184            | <b>0.036</b>                        | 0.540        | 0.591            |
|                  | Time*Clothianidin           | 6,54                           | 6.6   | <b>&lt;0.001</b> | 0.194                               | 0.151        | <b>&lt;0.001</b> |
|                  | Time* Predator*Clothianidin | 6,54                           | 1.6   | 0.166            | 0.288                               | 0.841        | <b>0.042</b>     |
| Between subjects | Predator                    | 3,27                           | 5.6   | <b>0.004</b>     | 0.846                               | 0.672        | <b>0.001</b>     |
|                  | Clothianidin                | 6,54                           | 1.3   | 0.295            | 0.123                               | 0.460        | 0.108            |
|                  | Predator*Clothianidin       | 6,54                           | 2.5   | <b>0.033</b>     | 0.640                               | <b>0.038</b> | <b>0.005</b>     |

3
