# Supplementary material for: Effects of clothianidin on aquatic communities: Evaluating the impacts of lethal and sublethal exposure to neonicotinoids
Source: PubMed Central journal article supplement (PMC5363855; doi:10.1371/journal.pone.0174171), 2017-03-23
Supplement: pone.0174171.s009.pdf [file pone.0174171.s009.pdf]

1 **S4 Table. The results of analyses on the survival and biomass of all predator species**  
 2 **combined and each individual species when exposed to different levels of clothianidin. P-**  
 3 **values are listed with associated Chi-squared-statistics; bold P-values are significant at P <0.05.**

| Source            | d.f | Mortality   |                  | Mass        |              |
|-------------------|-----|-------------|------------------|-------------|--------------|
|                   |     | Chi-squared | P                | Chi-squared | P            |
| Total             | 2   | 7.85        | <b>0.020</b>     | 10.72       | <b>0.005</b> |
| <i>Anax</i>       | 2   | 9.77        | <b>0.008</b>     | 5.73        | 0.057        |
| <i>Orconectes</i> | 2   | 30.62       | <b>&lt;0.001</b> | 6.94        | <b>0.030</b> |
| <i>Belostoma</i>  | 2   | 13.99       | <b>&lt;0.001</b> | 7.6         | <b>0.022</b> |
| <i>Notonectid</i> | 2   | 9.62        | <b>0.009</b>     | 5.63        | 0.060        |

4

5
