# Supplementary material for: Effects of clothianidin on aquatic communities: Evaluating the impacts of lethal and sublethal exposure to neonicotinoids
Source: PubMed Central journal article supplement (PMC5363855; doi:10.1371/journal.pone.0174171), 2017-03-23
Supplement: pone.0174171.s010.pdf [file pone.0174171.s010.pdf]

1 **S5 Table. Mean concentrations (ppb) of neonicotinoids detected in soil samples at four sites in Tippecanoe County, IN over the**  
 2 **2015 planting season**

| Chemical     | Site     | Pre-planting | Week post-planting |         |         |         |        |        |        |
|--------------|----------|--------------|--------------------|---------|---------|---------|--------|--------|--------|
|              |          |              | 2                  | 3       | 4       | 5       | 6      | 7      | 8      |
| Clothianidin | Box      | 27.911       | 27.432             | 60.948  | 32.042  | 56.573  | 27.488 | 22.461 | 18.159 |
|              | Marshall | 23.193       | 36.887             | 19.852  | 176.471 | 48.549  | 42.342 | 21.494 | 61.327 |
|              | TPAC     | 8.565        | 9.887              | 8.784   | 5.054   | 8.008   | 4.920  | 3.232  | 6.778  |
|              | Martell  | 0.000        | 0.000              | 15.237  | 0.000   | 2.644   | 0.000  | 0.000  | 0.000  |
| Acetamiprid  | Box      | 5.978        | 7.116              | 6.204   | 4.329   | 4.575   | 0.000  | 0.000  | 0.000  |
|              | Marshall | 6.122        | 6.242              | 5.197   | 3.785   | 0.000   | 0.000  | 0.000  | 0.000  |
|              | TPAC     | 0.000        | 7.124              | 4.445   | 6.048   | 2.806   | 2.643  | 0.000  | 0.000  |
|              | Martell  | 0.000        | 6.573              | 3.561   | 4.081   | 2.957   | 0.000  | 0.000  | 0.000  |
| Imidacloprid | Box      | 3.765        | 4.702              | 9.412   | 4.751   | 4.539   | 5.424  | 4.849  | 0.799  |
|              | Marshall | 10.414       | 50.268             | 20.444  | 23.633  | 88.989  | 22.303 | 23.495 | 17.627 |
|              | TPAC     | 7.507        | 47.982             | 141.283 | 50.019  | 130.899 | 3.409  | 11.806 | 14.491 |
|              | Martell  | 0.000        | 0.000              | 0.000   | 0.000   | 0.000   | 0.000  | 0.000  | 0.202  |

3
