# Supplementary material for: Effects of clothianidin on aquatic communities: Evaluating the impacts of lethal and sublethal exposure to neonicotinoids
Source: PubMed Central journal article supplement (PMC5363855; doi:10.1371/journal.pone.0174171), 2017-03-23
Supplement: pone.0174171.s011.pdf [file pone.0174171.s011.pdf]

1 **S6 Table. Mean concentrations (ppb) of neonicotinoids detected in water samples at six sites in Tippecanoe County, IN over**  
 2 **the 2015 planting season.**

| Chemical     | Site     | Pre-planting | Week post-planting |         |         |         |          |          |         |
|--------------|----------|--------------|--------------------|---------|---------|---------|----------|----------|---------|
|              |          |              | 2                  | 3       | 4       | 5       | 6        | 7        | 8       |
| Clothianidin | Box      | 0.103        | 0.057              | 0.019   | 0.054   | 0.034   | 0.124    | 0.094    | 0.072   |
|              | Marshall | 0.038        | 0.039              | 0.047   | 0.019   | 0.020   | 0.178    | 0.101    | 0.109   |
|              | TPAC     | 0.006        | 0.043              | 0.027   | 0.032   | 0.044   | 0.050    | 0.028    | 0.097   |
|              | Martell  | 0.018        | 0.025              | 0.040   | 0.014   | 0.037   | 0.153    | 0.134    | 0.094   |
|              | PWA E    | 0.034        | 0.006              | 0.008   | 0.012   | 0.097   | 0.012    | 0.548    | 0.671   |
|              | PWA W    | 0.000        | 0.409              | 0.267   | 0.067   | 0.006   | 0.436    | 0.000    | 0.449   |
| Imidacloprid | Box      | 0.002        | 0.004              | 0.004   | 0.035   | 0.004   | 0.019    | 0.006    | 0.004   |
|              | Marshall | 0.000        | 0.019              | 0.177   | 0.003   | 0.000   | 0.025    | 0.008    | 0.011   |
|              | TPAC     | 0.002        | 0.016              | 0.014   | 0.016   | 0.017   | 0.019    | 0.014    | 0.041   |
|              | Martell  | 0.007        | 0.008              | 0.015   | 0.007   | 0.012   | 0.049    | 0.045    | 0.060   |
|              | PWA E    | 0.025        | 0.000              | 0.000   | 0.009   | 0.013   | 0.005    | 0.032    | 0.040   |
|              | PWA W    | 0.006        | 0.012              | 0.018   | 0.008   | 0.011   | 0.021    | 0.000    | 0.036   |
| Thiamethoxam | Box      | 339.791      | 275.822            | 48.703  | 341.091 | 106.071 | 903.767  | 1019.175 | 418.612 |
|              | Marshall | 84.303       | 105.508            | 285.535 | 37.582  | 15.426  | 396.668  | 171.397  | 197.644 |
|              | TPAC     | 22.380       | 23.405             | 16.114  | 120.412 | 248.222 | 238.994  | 169.560  | 104.156 |
|              | Martell  | 312.631      | 287.166            | 224.167 | 67.969  | 582.359 | 2568.050 | 2093.764 | 668.123 |
|              | PWA E    | 43.475       | 134.855            | 19.358  | 42.535  | 37.545  | 92.036   | 160.523  | 218.741 |
|              | PWA W    | 0.000        | 155.602            | 241.269 | 36.961  | 214.435 | 82.503   | 465.630  | 96.918  |

3
